# Supplementary material
Source: publisher site journal article supplement (https://www.dovepress.com/get_supplementary_file.php?f=387292.docx)
Supplement: Supplementary file 1 [file get_supplementary_file.php]

***TRANSLATED QUESTIONNAIRE***

**1- Socio-demographic characteristics.**

**Q1: Gender** (single choice) ○ Male ○ Female

**Q2: Age** (single choice) ( ) years

**Q3: Profession** (single choice)

○ Healthcare professional ○ Nonmedical professional

**Q4: Whether you had ever used Chinese herbs to treat or prevent disorders excluding COVID-19 in recent 5 years?** (single choice)

○ Yes ○ No

1. **Practice of Chinese herb use under COVID-19 conditions.**

**Q5: Whether you had used Chinese herbs for the prevention of COVID-19?** (single choice)

○ Yes ○ No

**Q6: Where did you get information about application of Chinese herbs for COVID-19 control?** (multiple choice)

○ The family members, relatives, friends, *etc*.

○ Healthcare professionals, such as physicians and nurses.

○ Social media (Internet or TV, *etc*.).

○ Professional curriculum.

○ Other.

**Q7: Since the outbreak of COVID-19, have you paid close attention to** **official reports and news articles in social media related to the use of Chinese herbal medicine in COVID-19 control?** (single choice)

○ Never.

○ Sometimes.

○ Always.

**Q8: What is the most important factor to promote your own application of Chinese herbs to fight COVID-19?** (single choice)

○ Convenient dosage form of Chinese herbs.

○ A standardized regimen for the use of Chinese herbal medicine in COVID-19 control.

○ Clear pharmacological and toxicological properties of herbs.

○ News coverage and promotion by government officials, state media and medical experts*.*

○ Guaranteed quality of Chinese herbs and their products.

1. **Knowledge regarding using Chinese herbs for COVID-19 control.**

**Q9: Whether the application of traditional Chinese herbs has been officially recommended in the national *Guideline of Diagnosis and Treatment Plan for COVID-19*?** (single choice)

○ Yes ○ No ○ Unclear

**Q10: The application of traditional Chinese herbs has been suggested as an important complement to conventional treatment for ( ) COVID-19 patients.** (single choice)

○ Mild ○ Moderate ○ Severe ○ Critically ill ○ All of the above

○ Unclear

**Q11: The utilization rate and total efficiency rate of Chinese herbs among COVID-19 patients in Hubei province according to official reports are:** (single choice)

○ >90% ○ >80% ○ >70% ○ >60% ○ >50%

**Q12: Which is NOT one of *three Chinese patent medicines* that have been screened out for the effective COVID-19 control?** (single choice)

○ *Lianhua Qingwen* Capsule. ○ *Xiaochaihu* decoction.

○ *Jinhua Qinggan* Granules. ○ *Xuebijing* Injection.

**Q13:** **Which is NOT one of *three herbal prescriptions* that have been screened out for the effective COVID-19 control?** (single choice)

○ *Qingfei Huayu Recipe*. ○ *Xuanfeibaidu Recipe*.

○ *Huashi Paidu Recipe*. ○ *Qingfei Paidu* Decoction.

1. **Attitudes and opinions concerning the application of Chinese herbs to fight COVID-19.**

**Q14: The application of Chinese herbal medicine is important to prevent COVID-19 in healthy individuals.** (single choice)

○ Strongly disagree. ○ Disagree. ○ Neutral. ○ Agree. ○ Strongly agree.

**Q15: The application of Chinese herbal medicine is important for the treatment of COVID-19 patients to improve their symptoms and prognosis.** (single choice)

○ Strongly disagree. ○ Disagree. ○ Neutral. ○ Agree. ○ Strongly agree.

**Q16: If there are COVID-19 patients around me, I would like to use Chinese herbs to prevent self-infection.** (single choice)

○ Strongly disagree. ○ Disagree. ○ Neutral. ○ Agree. ○ Strongly agree.

**Q17: The performance of traditional Chinese herbal medicine in the prevention and control of COVID-19 pandemic would effectively promote my confidence in Traditional Chinese Medicine.** (single choice)

○ Strongly disagree. ○ Disagree. ○ Neutral. ○ Agree. ○ Strongly agree.

**Q18:** **The performance of traditional Chinese herbal medicine in the prevention and control of COVID-19 pandemic would contribute to the popularization and globalization of Traditional Chinese Medicine.** (single choice)

○ Strongly disagree. ○ Disagree. ○ Neutral. ○ Agree. ○ Strongly agree.

**Q19:** **If you are a *mild* COVID-19 patient, which is your most preferred drug therapy?** (single choice)

○ Only Chinese herbal medicine therapy.

○ Only Western Medicine therapy.

○ Integration of Chinese herbal and Western medicine.

○ I don't know, it's up to the doctors.

**Q20:** **If you are a *severe* COVID-19 patient, which is your most preferred drug therapy?** (single choice)

○ Only Chinese herbal medicine therapy.

○ Only Western Medicine therapy.

○ Integration of Chinese herbal and Western medicine.

○ I don't know, it's up to the doctors.

| **Q21: What is the most important advantage of Chinese herbs to fight COVID-19?** (single choice) |
| --- |
| ○ Effectiveness. |
| ○ Safety. |
| ○ Etiologically oriented therapy to treat the underlying causes of disorders.  ○ Multi-target therapy.  ○ Holistic therapy taking the human body as a whole.  ○ Rich experiences of Traditional Chinese Medicine in applying herbs to combat epidemic diseases over the past thousands of years.  ○ The concept of "*prevention before disease onset*" in Traditional Chinese Medicine.  ○ No advantage. |

**Q22: What do you think about the research finding from a clinical study involving 75 moderate type COVID-19 patients suggesting that honeysuckle decoction treatment might be greatly helpful in curing infected patients and in stopping the COVID-19 pandemic?** (single choice)

○ It is a very exciting research finding, and I will take honeysuckle decoction to prevent self-infection of COVID-19..

○ This finding needs further confirmation, but I still want to take honeysuckle decoction to prevent self-infection of COVID-19.

○ Before this finding is further confirmed, I will not take honeysuckle decoction to prevent self-infection of COVID-19.

○ This finding needs further confirmation, but I do not believe that honeysuckle decoction really has this effect.
